# Supplementary material for: Diversity of fish sound types in the Pearl River Estuary, China
Source: PeerJ journal article supplement (doi:10.7717/peerj.3924), 2017-10-24
Supplement: Supplemental_Tables.zip [file Supplemental_Tables.zip]

**Table S1 Descriptive statistics of the sonic parameters of single and paired pulse call types.**

P50, median; P5 and P95, 5th percentile and 95th percentile, respectively; QD, quartile deviation; Dur, duration; IPPI, inter-pulsepeak interval; τ95%, duration of 95% cumulative energy; τ-3dB andτ-10dB, duration of -3 dB and -10 dB of the peak amplitude of the enveloped signal, respectively; fp, peak frequency; fc, center frequency; BWrms, centralized root-mean-square bandwidth; Q, quality factor; SPLzp and SPLrms, zero-to-peak and root-mean-square sound pressure levels, respectively; EFD, energy flux density; N1, N2 and N3, number of calls, inter-pulsepeak intervals and pulses analyzed, respectively. The duration is in seconds, the frequency is in Hz, the SPL is in dB re 1 µPa, and the EFD is in dB re 1µPa2s. The IPIs are not shown here and can be obtained by subtracting 8 ms from the IPPIs. The same notation was used for the following tables.

**Table S2 Descriptive statistics of sonic parameters of the 2+N9, 2+N10 and 2+N18 call types.**

**Table S3 Descriptive statistics of sonic parameters of the 3+N9, 3+N10 and 3+N17 call types.**

**Table S4 Descriptive statistics of sonic parameters of the 4+N9, 4+N10 and 4+N17 call types.**

**Table S5 Descriptive statistics of sonic parameters of 5+N10 call type.**

**Table S6 Descriptive statistics of sonic parameters of the (1-)2+N9, (1-)2+N10 and (1-)2+N12 call types.**

**Table S7 Descriptive statistics of sonic parameters of the 1+2+N10 and 1+2+N18 call types.**

**Table S8 Descriptive statistics of sonic parameters of the 2+1+N9 and 2+1+N10 call types.**

**Table S9 Descriptive statistics of sonic parameters of the (2-)2+N10 and 4+1+N10 call types.**

**Table S10 Descriptive statistics of sonic parameters of the 3+1+N9 and 3+1+N10 call types.**

**Table S11 Descriptive statistics of sonic parameters of the 3+2+N9 and 3+(1-)2+N9 call types.**

**Table S12 Descriptive statistics of sonic parameters of the (1-)3+N9, (1-)3+N10 and (1-)3+N12 call types.**

**Table S13 Descriptive statistics of sonic parameters of the (1-)2+2+N9 and (1-)2+2+N10 call types.**

**Table S14 Descriptive statistics of sonic parameters of the (1-)2+3+N10 call type.**

**Table S15 Descriptive statistics of sonic parameters of the 2+(1-)2+N9 and 2+(1-)2+N10 call types.**

**Table S16 Descriptive statistics of sonic parameters of the 2+1+2+N9 and 2+1+2+N10 call types.**

**Table S17 Descriptive statistics of sonic parameters of the (1-)4+N9,(1-)4+N10 and (1-)4+N12 call types.**

**Table S18 Descriptive statistics of sonic parameters of the (1-)3+2+N10 and (1-)3+3+N10 call types.**

**Table S19 Descriptive statistics of sonic parameters of the (1-)2+2+1+N10 and (1-)2+2+3+N10 call types.**

**Table S20 Descriptive statistics of sonic parameters of the 2+(1-)3+N10 and 2+(1-)4+N10 call types.**

**Table S21 Descriptive statistics of sonic parameters of the (1-)5+N9 and (1-)5+N10 call types.**

**Table S22 Descriptive statistics of sonic parameters of the (1-)4+2+N10 and (1-)4+3+N11 call types.**

**Table S23 Descriptive statistics of sonic parameters of the (1-)3+2+1+N10 and (1-)4+2+1+N10 call types.**

**Table S24 Descriptive statistics of sonic parameters of the (1-)6+N10 and (1-)7+N10 call types.**

**Table S25 Descriptive statistics of sonic parameters of the (1-)5+2+N10 and (1-)5+3+N10 call types.**

**Table S26 Descriptive statistics of sonic parameters of the (1-)4+(2-)2+N10 and (1-)5+(2-)2+N10 call types.**
